# Supplementary material
Source: publisher site journal article supplement (http://www.kjim.org/upload/media/kjim-2021-427-suppl4.pdf)
Supplement: Supplementary file 1 [file kjim-2021-427-suppl4.pdf]

**Supplementary Table 4. Multivariable analysis for predictors of recurrent acute myocardial infarction within 1 year**

| Variable               | Odds ratio (95% CI) | <i>p</i> value |
|------------------------|---------------------|----------------|
| Killip class III or IV | 1.485 (1.021–2.159) | 0.038          |
| Hypertension           | 1.480 (1.090–2.010) | 0.012          |
| Diabetes mellitus      | 1.389 (1.025–1.881) | 0.034          |
| Atypical chest pain    | 1.545 (1.072–2.227) | 0.020          |
| Multivessel disease    | 1.585 (1.174–2.140) | 0.003          |
| Statin                 | 0.567 (0.363–0.885) | 0.012          |

CI, confidence interval.
